# Supplementary material
Source: Springer Nature journal article supplement (https://www.springermedizin.de/resource/supplementary/12961_2008_134_MOESM1_ESM.pdf/9571508)
Supplement: MOESM1 [file 9571508]

### **HEALTH PROFESSIONALS' NEEDS**

- research to inform and confirm clinical practice (including safety) and service organisation
  - access to training and continuing education informed by research
  - resources for research implementation
- Capacities to:
- critically appraise, evaluate and absorb research
  - identify areas where further research is required and set agendas
  - (in some cases) conduct research useful to the healthcare system.

### **PATIENTS'/ PUBLIC'S NEEDS**

- access to health research, and ongoing communication on health risks and resources, so as to make informed decisions about behaviour and health services
  - mechanisms to engage with policy, service, and research processes
  - accountability of health research, policy, and service provision
- Capacities to
- access and understand research evidence (ie health literacy)

### **Research liaison and brokerage tasks/ Interface and boundary mechanisms**

### **RESEARCHERS' NEEDS**

- resources for research and its dissemination
  - control/ independence in research process
  - acceptance of range of research methods and epistemologies
  - appropriate incentives and assessment for different types of research
- Capacities to:
- conduct high-quality research
  - communicate research

### **Research liaison and brokerage tasks/ Interface and boundary mechanisms**

### **POLICYMAKERS' & HEALTH MANAGERS' NEEDS**

- research to provide wider range of validated concepts, experiences and technical knowledge (including on safety) than otherwise available
- Capacities to:
- scrutinise areas of policy to identify knowledge gaps or conflicts
  - determine if research is required to address these problems
  - define research needs in outline to enable resource allocation and researcher selection
  - evaluate and assimilate research findings into policy
  - promote research dissemination

### **INDUSTRY'S NEEDS**

- a flow of findings from publicly funded research
  - interaction with the public health research system over agendas etc
  - a health care system and health research system capable and willing to host and conduct trials of new products
- Capacities to:
- liaise with other stakeholders
